# Supplementary material for: Regulation of SNAIL1 and E-cadherin function by DNMT1 in a DNA methylation-independent context
Source: PubMed Central journal article supplement — Nucleic Acids Res. 2011 Aug 16;39(21):9194–205. doi: 10.1093/nar/gkr658 (PMC3241660; doi:10.1093/nar/gkr658), 2011-08-16
Supplement: supp_gkr658_SUPPLEMENTARY_MATERIAL.pdf [file supp_gkr658_SUPPLEMENTARY_MATERIAL.pdf]

## SUPPLEMENTARY MATERIAL

### SUPPLEMENTARY FIGURE LEGENDS

**Supplementary Figure 1. Downregulation of E-cadherin but not of  $\beta$ -catenin or SNAIL1 proteins after disruption of PCNA and DMAP1 binding domains of DNMT1.** Quantification of the Integrated Density (the product of Area and Mean Gray Value) of protein expression signals obtained in semiquantitative immunoblot analysis of the expression of E-cadherin,  $\beta$ -catenin and SNAIL1 relative to the expression of  $\beta$ -tubulin in HCT116 *DNMT1*<sup>+/+</sup>, *DNMT1* <sup>$\Delta$ E3-6</sup>, and *DNMT3b*<sup>-/-</sup> cells. Analyses were performed in triplicate and the mean  $\pm$  SD are shown. \*\*:  $p < 0.001$ .

**Supplementary Figure 2. Epithelial-mesenchymal transition marker proteins are expressed after disruption of PCNA and DMAP1 binding domains of DNMT1.** Semiquantitative analysis by immunoblot of the expression level of the indicated proteins in HCT116 *DNMT1*<sup>+/+</sup> and *DNMT1* <sup>$\Delta$ E3-6</sup> cells. Results are representative of three separate experiments.

**Supplementary Figure 3. Deletion of PCNA and DMAP1 domains of DNMT1 or of DNMT3b does not alter the unmethylated status of *E-cadherin* and *SNAIL1* promoters in HCT116 cells.** A) Analysis by bisulfite sequencing of the status of CpG methylation in the promoter sequences of *E-cadherin* or *SNAIL1* genes. The two promoters are equally demethylated in HCT116 *DNMT1*<sup>+/+</sup>, *DNMT1* <sup>$\Delta$ E3-6</sup>, and *DNMT3b*<sup>-/-</sup> cell lines. Ten different clones were analyzed in each case. B) Analysis of *E-cadherin* and *SNAIL1* promoter methylation in different cell lines by DNA restriction with a methylation-sensitive endonuclease followed by PCR. The isoschizomers Hpa II (methylation-sensitive) and MspI (methylation-insensitive) were used. The breast cancer cell lines MDA-MB-231 and MDA-MB-435 were used as positive control samples for *E-cadherin* methylation. *E-cadherin* and *SNAIL1* promoters are unmethylated in HCT116 *DNMT1*<sup>+/+</sup>, *DNMT1* <sup>$\Delta$ E3-6</sup>, *DNMT3b*<sup>-/-</sup>, *DNMT*<sup>DKO</sup> cells

and normal lymphocytes. “In vitro” methylated DNA (IMD) was also used as positive control.

**Supplementary Figure 4. Deletion forms of *DNMT1* cDNA lacking the catalytic domain (*DNMT1*<sup>ΔCat</sup>), or the catalytic and BAH domains (*DNMT1*<sup>ΔCat/BAH</sup>) are located in the cell nucleus.** Immunolocalization analysis of the distribution of different DNMT1 cDNA forms fused to RFP (red) and co-localization with DAPI-stained chromatin (blue).

**Supplementary Figure 5. *DNMT*<sup>DKO</sup> cells, showing that combined deletion of PCNA and DMAP1 domains of *DNMT1* and of both copies of *DNMT3b* in HCT116 cells results in E-cadherin downregulation, nuclear translocation of β-catenin, and activation of β-catenin-dependent transcriptional signaling. This phenotype reverts to that of the parental cells after introduction of full-length *DNMT1*.** A) Phase-contrast images of living cultured cells (left panels) and Ca<sup>2+</sup>-dependent fast cell-cell aggregation assays in the presence or absence of a functional antibody against E-cadherin (Decma1) and the Ca<sup>2+</sup>-chelating agent EDTA (right panel) in HCT116 *DNMT1*<sup>+/+</sup> and *DNMT*<sup>DKO</sup> cells. B) Immunolocalization of β-catenin in HCT116 *DNMT1*<sup>+/+</sup> and *DNMT*<sup>DKO</sup> cells. Bar: 10 μm. C) Quantitative analysis of *E-cadherin* mRNA expression by qRT-PCR in HCT116 *DNMT1*<sup>+/+</sup>, *DNMT*<sup>DKO</sup> cells and *DNMT*<sup>DKO</sup> cells transfected with full-length *DNMT1*. Relative expression levels are normalized to that of actin expression. D) Normalized *Luciferase/Renilla* activities of reporter vectors transiently transfected in HCT116 *DNMT1*<sup>+/+</sup>, *DNMT*<sup>DKO</sup> cells and *DNMT*<sup>DKO</sup> cells transfected with full-length DNMT1, containing either TOP multimerized promoter sequences recognized by β-catenin-Lef/Tcf complexes, or the human cyclinD1 promoter. Analyses were performed in triplicate and the mean ± SD are shown. \*\*: p<0.001.

**Supplementary Figure 6. DNMT1 and SNAIL1 do not interact in HCT116 *DNMT1*<sup>ΔE3-6</sup> cells.** A) Co-immunoprecipitation assay of endogenous DNMT1 showing interaction with SNAIL1 in *DNMT1*<sup>+/+</sup> but not in *DNMT1*<sup>ΔE3-6</sup> cells. B) Direct immunofluorescence analysis of SNAIL1 and DNMT1 distribution in the

nucleus of in DNMT1<sup>ΔE3-6</sup> cells, showing lack of co-localization of both proteins. Images are of 0.1-μm-thick sections in the z-plane obtained by confocal microscopy. Bar: 5 μm.

**Supplementary Figure 7. DNMT1 and SNAIL1 can interact in the cell nucleus.**

A) An additional example of an extended biomolecular fluorescence complementation assay (ExBiFC) to demonstrate the interaction of DNMT1 and SNAIL1 in the cell nucleus showing cells expressing DNMT1-RFP+C-YFP and SNAIL1-CFP+N-YFP. Both tagged proteins showed a homogeneous distribution pattern in the cell nucleus. By contrast the yellow emission corresponding to the N+C-YFP fusion was located in discrete regions of the nuclear compartment. Bar: 5 μm. B) No complementation of YFP was detected SNAIL1-CFP+N-YFP and DNMT1 construct lacking the DMAP1 and PCNA domains (DNMT1<sup>ΔN</sup>-RFP+C-YFP) were co-expressed. Bar: 5 μm. C) Control experiments for ExBiFC assays, showing co-expression of DNMT1-RFP+C-YFP and Empty-CFP+N-YFP (upper panels; bar: 10 μm ) or Empty vector-RFP+C-YFP and SNAIL1-CFP+N-YFP (lower panels; bar: 10 μm ), but absence of YFP emission.

**Supplementary Figure 8.** Interaction between DNMT1 and SNAIL1 in human embryonic kidney cells (HEK-293T). Constructs of human SNAIL1 cDNA fused to a His tag and of human DNMT1 fused to a Myc tag were transiently transfected in 293T cells. Pull-down assay of the interaction of SNAIL1-His and DNMT1-Myc are shown. Results are representative of two different experiments.

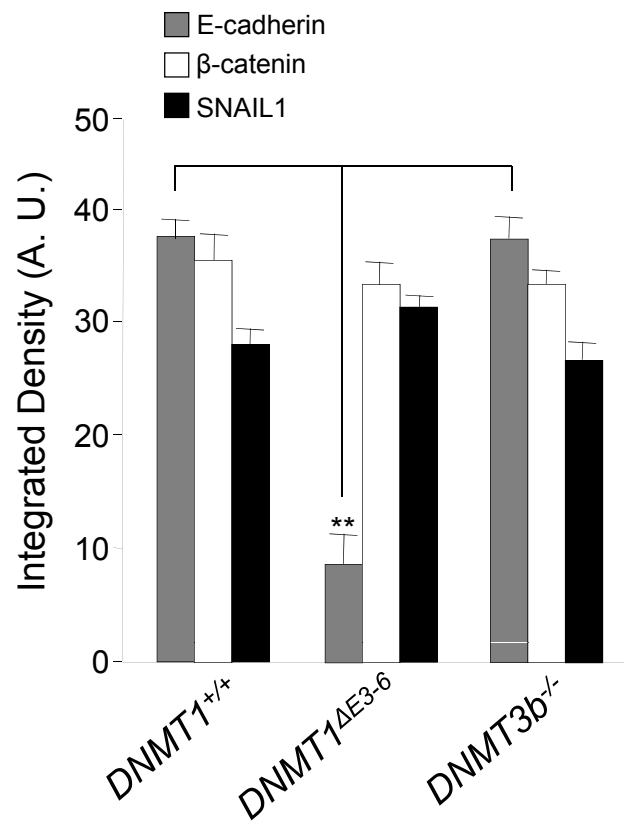

**Supplementary Figure 1. Espada et al., 2011**

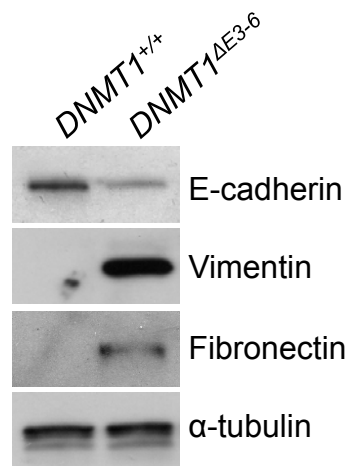

**Supplementary Figure 2. Espada et al., 2011**

**A**

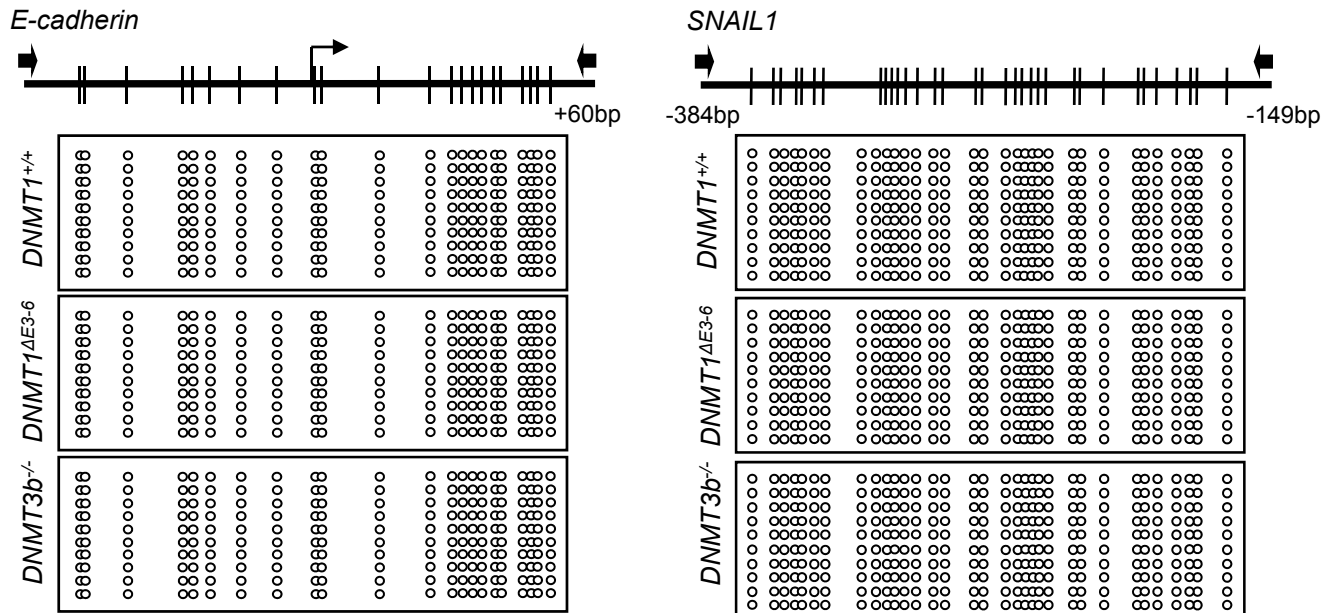

**B**

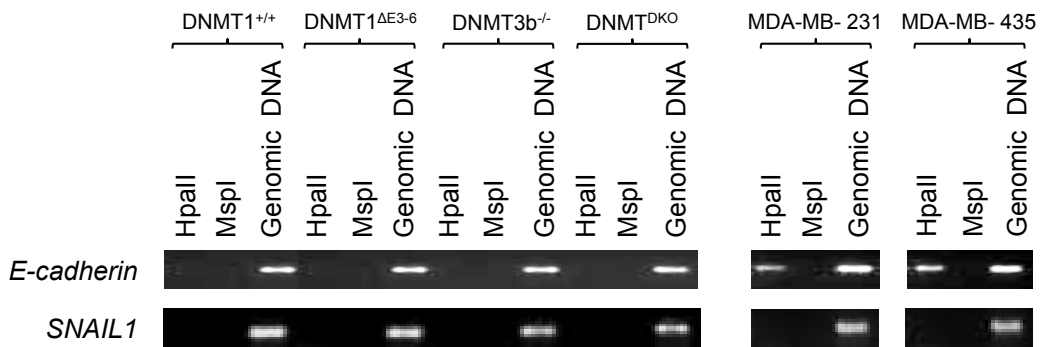

**Supplementary Figure 3. Espada et al., 2011**

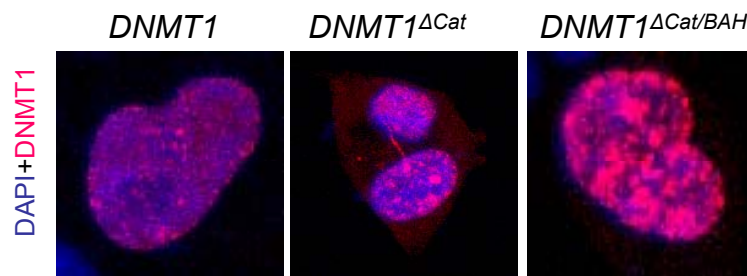

**Supplementary Figure 4. Espada et al., 2011**

**A**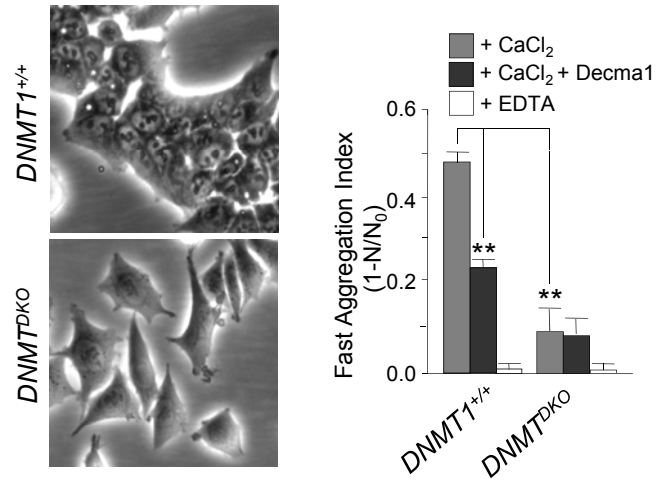**B**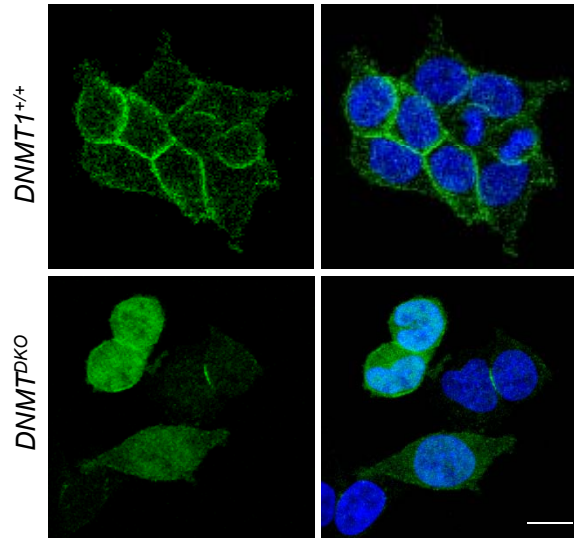**C**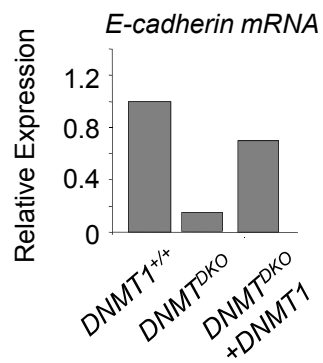**D**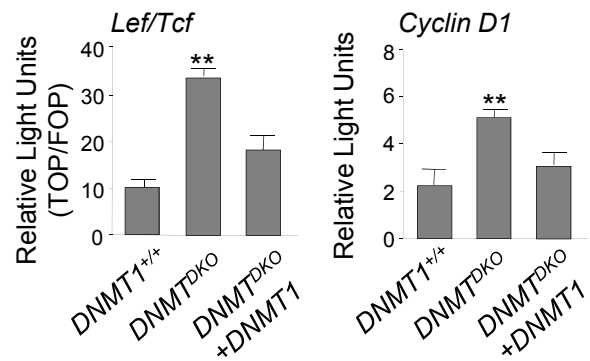

**Supplementary Figure 5. Espada et al., 2011**



A

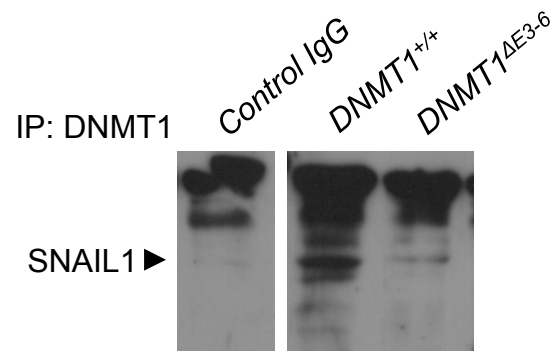

B

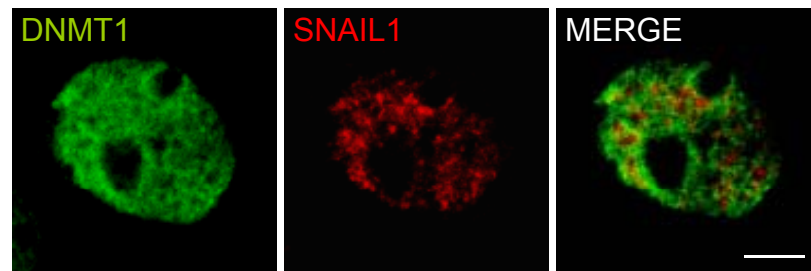

Supplementary Figure 6. Espada et al., 2011

A

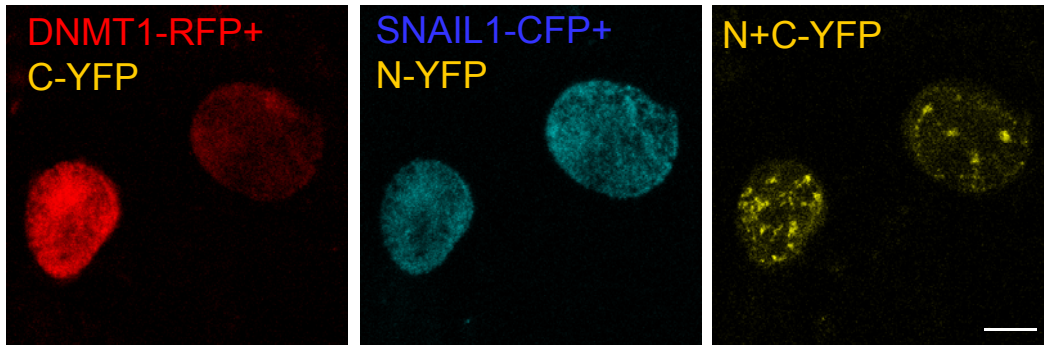

B

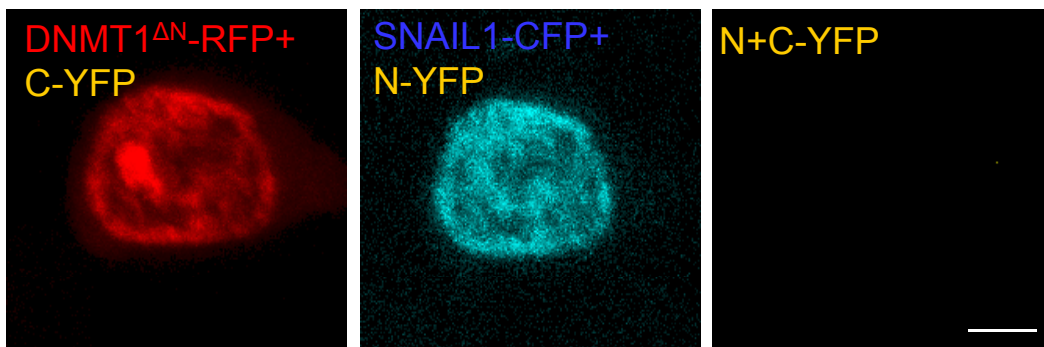

C

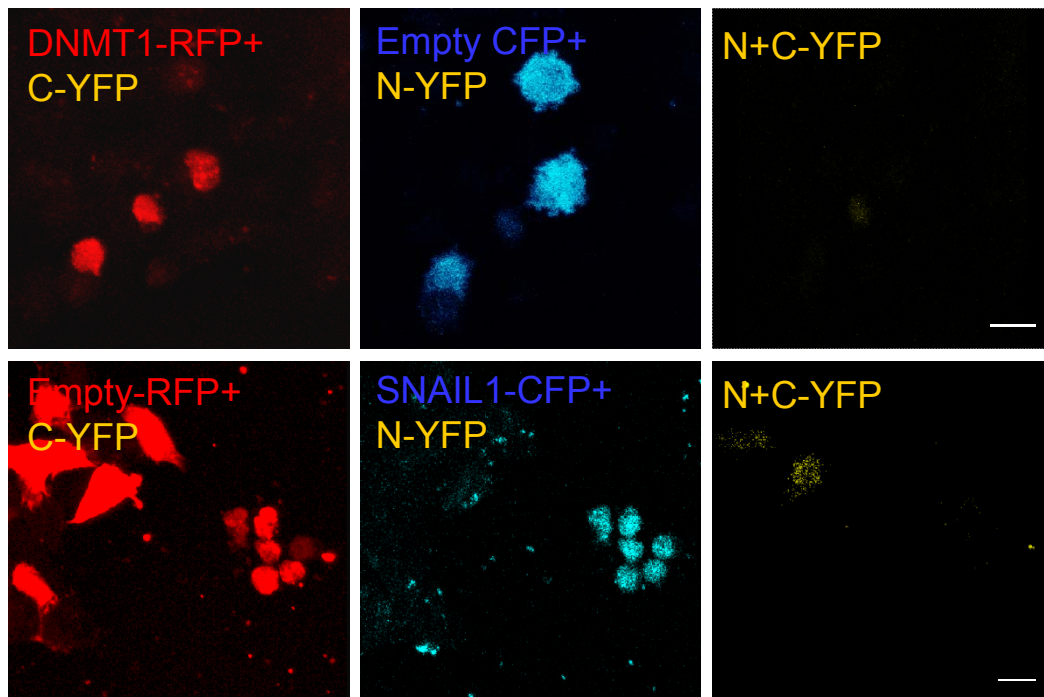

Supplementary Figure 7. Espada et al., 2011

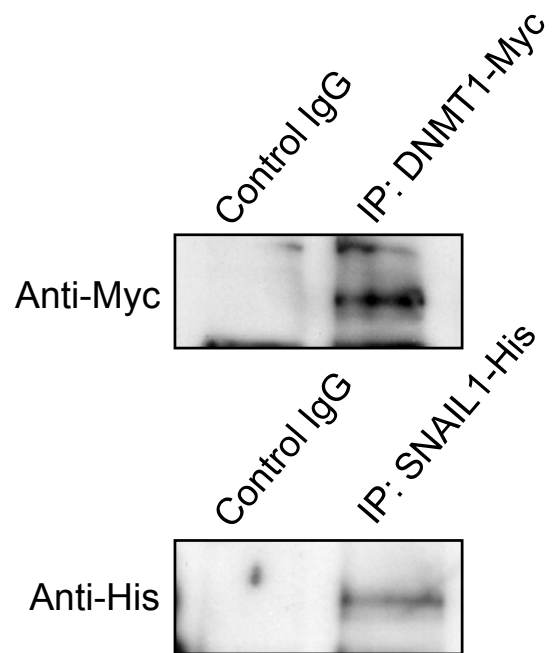

**Supplementary Figure 8. Espada et al., 2011**

## Supplementary Table 1.

### Cloning Primers

#### Human SNAIL1

SNAIL1-Forward EcoRI:

AAAAAAAAGAATTTCGCCGCCACCATGCCGCGCTCTTTCCTCGTCAGGAAGCCCTCCGACC  
CCAATCGG

SNAIL1-Reverse NotI:

AAAAAAAAGCGGCCGCTCAGCGGGGACATCCTGAGCAGCCGGACTCTTGGTGCTTGTGGA  
GCAGGGA

Annealing: 72°C

#### Human SNAIL1-CFP

SNAIL1-Forward SacII:

AAAAAAAACCGCGGGGCCGCCACCATGCCGCGCTCTTTCCTCGTCAGGAAGCCCTCCGACC  
CCAATCGG

SNAIL1-Reverse Nhe I':

AAAAAAAAGCTAGCGCGGGGACATCCTGAGCAGCCGGACTCTTGGTGCTTGTGGAGCAGG  
GA

Annealing: 70°C

#### Human DNMT1

DNMT1-Forward EcoRI:

AAAAAAAAGAATTTCGCCGCCACCATGCCGGCGCGTACCGCCCCAGCCCGGGTGCCCA

DNMT1-Reverse NotI:

AAAAAAGCGGCCGCCTAGTCCTTAGCAGCTTCTCCTCCTTTATTTTAGCT

Annealing: 69°C

#### Human DNMT1<sup>ΔCat/BAH</sup>

DNMT1<sup>ΔCat/BAH</sup>-Forward EcoRI:

AAAAAAAAGAATTTCGCCGCCACCATGCCGGCGCGTACCGCCCCAGCCCGGGTGCCCA

DNMT1<sup>ΔCat/BAH</sup> Reverse-NotI:

AAAAAAGCGGCCGCCTAGGCCCGAGGACTGTGTCTGTCCCAGCGCAGAACCAGTGGG  
CGTGAA

Annealing: 73°C

#### Human DNMT1<sup>Δcat</sup>

DNMT1<sup>Δcat</sup>-Forward EcoRI:

AAAAAAAAGAATTTCGCCGCCACCATGCCGGCGCGTACCGCCCCAGCCCGGGTGCCCA

DNMT1<sup>Δcat</sup>-Reverse NotI:  
AAAAAAGCGGCCGCCTACACAGCGTGTGAGAGATGCCTGCTTGGTGAATCCCTCCG  
ACA

Annealing: 70°C

### Human DNMT1<sup>ΔN</sup>

Human DNMT1<sup>ΔN</sup> Forward EcoRI-Kozak-NLS:  
AATTCGCCGCCACCATGGGCTCTGGCAAACGGAAACCTCAGGAAGAGTCTGAAAGAGCC  
AAATCGGATGAGTCCATCAAGGAAGAAGACAAAGACCAGGATGAGAAGAGACGTATG

Human DNMT1<sup>ΔN</sup> Reverse BamHI:  
GATCCATACGTCTCTTCTCATCCTGGTCTTTGTCTTCTTCTTGGACTCATCCGATTTG  
GCTCTTTCAGACTCTTCTGAGGTTTCCGTTTGCCAGAGCCCATGGTGGCGGCG

Annealing: 72°C

### Human DNMT1-RFP

Human DNMT1-RFP Forward EcoRI:  
AAAAAAAAGAATTGCGCGCCACCATGCCGGCGCGTACCGCCCCAGCCCGGGTGCCCA

Human DNMT1-RFP Reverse NheI:  
AAAAAAGCTAGCGTCCTTAGCAGCTTCCTCCTCCTTTATTTTAGCT

Annealing: 60°C

### Human DNMT1<sup>ΔN</sup>-RFP

Human DNMT1<sup>ΔN</sup>-RFP Forward EcoRI-NLS:  
AAAAAAAAGAATTGCGCGCCACCATGGGCTCTGGCAAACGGAAACCTCAGGAAGAGTCT  
GAAAG

Human DNMT1<sup>ΔN</sup>-RFP Reverse NheI:  
AAAAAAGCTAGCGTCCTTAGCAGCTTCCTCCTCCTTTATTTTAGCT

Annealing: 60°C

## **Bisulfite Sequencing Primers**

### E-cadherin

E-cadherin Forward:  
TTGTTGATTGGTTGTGGT

E-cadherin Reverse:  
TCCRAAATACCTACAACAACA

Annealing: 50°C

### SNAIL1

SNAIL1 Forward:  
TTTTTTTTTTAGTGATGTGYGT

SNAIL1 Reverse:  
AACCTTATCTACCCACRCCC

Annealing: 50°C

## **Methylation Specific PCR (MSP) Primers**

### E-cadherin

Methylated E-cadherin Forward:  
TAGTTCGGTTCGATTGATC

Methylated E-cadherin Reverse:  
GAATACGTCCCTCGCAAAT

Annealing: 50°C

Unmethylated E-cadherin Forward:  
TTTTAGTTTGGTTTGATTTGATT

Unmethylated E-cadherin Reverse:  
CCCAAATACATCCCTCACAAAT

Annealing: 50°C

### SNAIL1

Methylated SNAIL1 Forward:  
CGTTTCGGAGGAGTTTTTC

Methylated SNAIL1 Reverse:  
CAATCGAAAACCTCGTCTCC

Annealing: 50°C

Unmethylated SNAIL1 Forward:  
TTGTTTTGGAGGAGTTTTT

Unmethylated SNAIL1 Reverse:  
CCAATCAAAAACCTCATCTCC

Annealing: 50°C

## **Quantitative RT-PCR Primers**

### E-cadherin

E-cadherin Forward:  
ATTGCTCACATTTCCCAACTC

E-cadherin Reverse:  
GTCACCTTCAGCCATCCT

### SNAIL1

SNAIL1 Forward:

TCTAATCCAGAGTTTACCTTCC

SNAIL1 Reverse:  
GAAGAGACTGAAGTAGAGGAG

## **RT-PCR Primers**

### E-cadherin

E-cadherin Forward:  
CAGCACGTACACAGCCCTAA

E-cadherin Reverse:  
ACCTGAGGCTTTGGATTCTT

Annealing: 52°C

### SNAIL1

SNAIL1 Forward:  
GAAAGGCCTTCAACTGCAAA

SNAIL1 Reverse:  
TGACATCTGAGTGGGTCTGG

Annealing: 52°C

## **Chromatin Immunoprecipitation Primers**

### E-cadherin

E-cadherin Forward:  
AGCGCTAGCAGGCTAGAGGGTCACCGCGT

E-cadherin Reverse:  
CCGAAGCTTACAGGTGCTTTGCAGTTCCG

Annealing: 61°C

### Satellite2

Satellite2 Forward:  
TCGCATAGAATCGAATGGAA

Satellite2 Reverse:  
GCATTGAGTCCGTGGA

Annealing: 50°C
